# Supplementary material
Source: PubMed Central journal article supplement (PMC6531346)
Supplement: NIHMS1526662-supplement-2.pdf [file NIHMS1526662-supplement-2.pdf]

## Reporting Summary

Nature Research wishes to improve the reproducibility of the work that we publish. This form provides structure for consistency and transparency in reporting. For further information on Nature Research policies, see [Authors & Referees](#) and the [Editorial Policy Checklist](#).

### Statistics

For all statistical analyses, confirm that the following items are present in the figure legend, table legend, main text, or Methods section.

n/a Confirmed

- The exact sample size ( $n$ ) for each experimental group/condition, given as a discrete number and unit of measurement
- A statement on whether measurements were taken from distinct samples or whether the same sample was measured repeatedly
- The statistical test(s) used AND whether they are one- or two-sided  
*Only common tests should be described solely by name; describe more complex techniques in the Methods section.*
- A description of all covariates tested
- A description of any assumptions or corrections, such as tests of normality and adjustment for multiple comparisons
- A full description of the statistical parameters including central tendency (e.g. means) or other basic estimates (e.g. regression coefficient) AND variation (e.g. standard deviation) or associated estimates of uncertainty (e.g. confidence intervals)
- For null hypothesis testing, the test statistic (e.g.  $F$ ,  $t$ ,  $r$ ) with confidence intervals, effect sizes, degrees of freedom and  $P$  value noted  
*Give  $P$  values as exact values whenever suitable.*
- For Bayesian analysis, information on the choice of priors and Markov chain Monte Carlo settings
- For hierarchical and complex designs, identification of the appropriate level for tests and full reporting of outcomes
- Estimates of effect sizes (e.g. Cohen's  $d$ , Pearson's  $r$ ), indicating how they were calculated

*Our web collection on [statistics for biologists](#) contains articles on many of the points above.*

### Software and code

Policy information about [availability of computer code](#)

Data collection

EchMRI-TM-130 Analyzer was used to record body composition data acquired using EchoMRI-TM-100H.  
MRI Analysis was done using a multi spin echo (MSME) sequence (repetition time[TR]= 500 ms, echo time[TE]=7.86 ms, averages =4) with and without fat suppression (fat suppression bandwidth=1401.17 Hz).  
BD FACS Diva 8.0.1 was used for data collection during flow cytometry analysis.

Data analysis

Graph design and statistical analysis was performed using GraphPad Prism V7.0.  
Postprocessing of MRI data was performed using ParaVision V6  
Quantitative analysis of adipose tissue H/E staining was performed using ImageJ-Adiposoft plugin V1.15.  
Immunohistochemistry stained sections were scanned using Panoramic 250 FLAH II (3DHISTECH) Digital Slide Scanner. The images were then analyzed using Cell Profiler V3.0.  
For flow cytometry data analysis we used FlowJo V10.4.2.  
For RNA-sequencing data was quinfified and analyzed using the TopHat2 (v2.0.10). Cufflinks (v2.2.1), Cuffdiff (v2.2.1) and the Cuffmerge pipeline. Enrichment analysis was performed with Cytoscape ClueGO 82 (v2.3.3).

For manuscripts utilizing custom algorithms or software that are central to the research but not yet described in published literature, software must be made available to editors/reviewers. We strongly encourage code deposition in a community repository (e.g. GitHub). See the Nature Research [guidelines for submitting code & software](#) for further information.

## Data

Policy information about [availability of data](#)

All manuscripts must include a [data availability statement](#). This statement should provide the following information, where applicable:

- Accession codes, unique identifiers, or web links for publicly available datasets
- A list of figures that have associated raw data
- A description of any restrictions on data availability

Accession number for the raw data of the RNAseq: GSE118819.

## Field-specific reporting

Please select the one below that is the best fit for your research. If you are not sure, read the appropriate sections before making your selection.

- Life sciences       Behavioural & social sciences       Ecological, evolutionary & environmental sciences

For a reference copy of the document with all sections, see [nature.com/documents/nr-reporting-summary-flat.pdf](https://www.nature.com/documents/nr-reporting-summary-flat.pdf)

## Life sciences study design

All studies must disclose on these points even when the disclosure is negative.

|                 |                                                                                                                                                                                                                                                                                                                                                                                                      |
|-----------------|------------------------------------------------------------------------------------------------------------------------------------------------------------------------------------------------------------------------------------------------------------------------------------------------------------------------------------------------------------------------------------------------------|
| Sample size     | All experiments described in this study were done using a sample size varying between n=3-5 as indicated in figure legends.                                                                                                                                                                                                                                                                          |
| Data exclusions | No data was excluded from the analysis.                                                                                                                                                                                                                                                                                                                                                              |
| Replication     | All data shown are either representative or pooled data from at least two successful independent experiments. In the case of RNA-sequencing data and histology (H/E data and immunofluorescent data), a single experiment was performed, quality control measures were taken to insure the validity of the experiment, this include measurement of viral load and body weight of LCMV-infected mice. |
| Randomization   | age- and sex-matched mice were randomly assigned to the experimental groups prior to the start of the experiment.                                                                                                                                                                                                                                                                                    |
| Blinding        | <i>Describe whether the investigators were blinded to group allocation during data collection and/or analysis. If blinding was not possible, describe why OR explain why blinding was not relevant to your study.</i>                                                                                                                                                                                |

## Reporting for specific materials, systems and methods

We require information from authors about some types of materials, experimental systems and methods used in many studies. Here, indicate whether each material, system or method listed is relevant to your study. If you are not sure if a list item applies to your research, read the appropriate section before selecting a response.

### Materials & experimental systems

| n/a                                 | Involved in the study                                           |
|-------------------------------------|-----------------------------------------------------------------|
| <input type="checkbox"/>            | <input checked="" type="checkbox"/> Antibodies                  |
| <input checked="" type="checkbox"/> | <input type="checkbox"/> Eukaryotic cell lines                  |
| <input checked="" type="checkbox"/> | <input type="checkbox"/> Palaeontology                          |
| <input type="checkbox"/>            | <input checked="" type="checkbox"/> Animals and other organisms |
| <input checked="" type="checkbox"/> | <input type="checkbox"/> Human research participants            |
| <input checked="" type="checkbox"/> | <input type="checkbox"/> Clinical data                          |

### Methods

| n/a                                 | Involved in the study                              |
|-------------------------------------|----------------------------------------------------|
| <input checked="" type="checkbox"/> | <input type="checkbox"/> ChIP-seq                  |
| <input type="checkbox"/>            | <input checked="" type="checkbox"/> Flow cytometry |
| <input checked="" type="checkbox"/> | <input type="checkbox"/> MRI-based neuroimaging    |

## Antibodies

Antibodies used

Rat IgG1 isotype, clone: MOPC-21 (0.5mg) BioXcell BE0083  
 Hamster IgG1 isotype, clone: N/A (0.2mg) BioXcell BE0091  
 Rat IgG1 anti-TNF $\alpha$ , clone: XT3.11 (0.5mg) BioXcell BE0058  
 Rat IgG1 anti-IFN $\gamma$ , clone: XMG1.2 (0.5mg) BioXcell BE0055  
 Hamster IgG1 anti-IL1 $\alpha$ , clone: ALF-161 (0.2mg) BioXcell BE0243  
 Rat IgG1 anti-IL6, clone: MP5-20F3 (0.5mg) BioXcell BE0046  
 Rat IgG2b anti-CD4, clone:YTS191 (0.2mg) BioXcell BE0119  
 Rat IgG2b anti-CD8, clone: YTS169.4 (0.2mg) BioXcell BE0117  
 Rat IgG2b anti-CD90, clone: T24 (200 $\mu$ g) BioXcell BE0212  
 Rat anti-CD16/CD32, clone: 93 (1:200) eBioscience #14-0161-82  
 Anti-mouse CD8b.2 Pacific Blue, clone: 53-5.8 (1:200) Biolegend #140414  
 Anti-mouse CD8a PE-Cy7, clone: 53-6.7 (1:200) Biolegend #100721

Anti-mouse CD8a PerCP-Cy5, clone:53-6.7 (1:200) Biolegend #100733  
 Anti-mouse CD8a FITC, clone: 53-6.7 (1:200) Biolegend #100803  
 Anti-mouse CD8a AF700, clone: 53-6.7 (1:200) Biolegend #100729  
 Anti-mouse CD4 Pacific Blue, clone: RM4-4 (1:200) Biolegend #116007  
 Anti-mouse CD3 APC, clone: 17A2 (1:200) Biolegend #100235  
 Anti-mouse CD3 PE-Cy7, clone: 145-2C11 (1:200) Biolegend #100319  
 Anti-mouse CD45.1 Pacific Blue, clone: A20 (1:200) Biolegend #110721  
 Anti-mouse CD45.1PE-Cy7, clone:A20 (1:200) Biolegend #110729  
 Anti-mouse CD45.2 PE, clone 104 (1:200) Biolegend #109807  
 Anti-mouse CD45.2 APC, clone:104 (1:200) Biolegend #109813  
 Anti-mouse CD44 BV605, clone: IM7 (1:200) Biolegend #103047  
 Anti-ATGL, (1:1000) Cell Signaling #2138S  
 Anti-HSL, (1:1000) Cell Signaling #4107S  
 Anti-phospho HSL Ser660, (1:1000) Cell Signaling #4126S  
 Anti-D418-Perlipin, (1:1000) Cell Signaling #3470S  
 Anti- $\beta$ -Actin, (1:1000) Abcam ab8224  
 HRP-conjugated anti-rabbit antibody, (1:4000) Dako P0448  
 Rat anti-mIFN- $\alpha$  capture antibody, (1:54) PBL Interferon Source 22100-1  
 Rabbit anti-mIFN- $\alpha$  detection antibody, (1:738) PBL Interferon Source 32100-1  
 Anti-rabbit HRP secondary antibody, (1:5000) Jackson ImmunoResearch 711-036-152  
 Rat anti-mIFN- $\beta$  capture antibody, (1:1000) PBL Interferon Source 22400-1  
 Rabbit anti-mIFN- $\beta$  detection antibody, (1:1000) PBL Interferon Source 32400-1  
 Rat anti-CD8a Alexa Fluor 647, clone:4SM15 (1:1000) eBioscience #4SM15  
 Alexa Fluor 488 anti-LCMV\_NP, (1:4000)

## Validation

All antibodies were validated as per manufacturer instruction. For FACS antibodies unstained samples were included in every run, to control for auto-fluorescence. The LCMV\_NP Alexa Fluor antibody has been previously validation in Kosak et al. Sci Rep. 2017 Sep 12;7(1):11289. DOI: 10.1038/s41598-017-10637-y

## Animals and other organisms

Policy information about [studies involving animals](#); [ARRIVE guidelines](#) recommended for reporting animal research

## Laboratory animals

Mouse: C57BL/6, The Jackson Laboratory JAX: 000664  
 Mouse: Ifn $\gamma$ <sup>-/-</sup>:B6.129S7-Ifn $\gamma$ 1tm1Agt/J, The Jackson Laboratory JAX: 003288  
 Mouse: Tnf<sup>-/-</sup>: B6.129S-Tnftm1gkl/J, The Jackson Laboratory JAX: 005540  
 Mouse: Tnfr1<sup>-/-</sup>: C57BL/6- Tnfrsf1atm1/mx/J, The Jackson Laboratory JAX: 003242  
 Mouse: Ifnar1<sup>-/-</sup>: B6.129S2-Ifnar1tm1Agt/Mmjax, The Jackson Laboratory JAX: 032045  
 Mouse: Ifnar1fl/fl: B6(Cg)-Ifnar1tm1.1Ees/J, The Jackson Laboratory JAX: 028256  
 Mouse: AdipoqCre/+ : B6:FVB-Tg(Adipoq-cre)1Evd/J, The Jackson Laboratory JAX: 010803  
 Mouse: Atglfl/fl: B6N.129S-Pnpla2tm1Eek/J, The Jackson Laboratory JAX: 024278  
 Mouse: Hsflfl/fl: B6.129P2-Lipetm1Rze/J, Laboratory of Rudolf Zechner, Graz, Austria. N/A  
 Mouse: Cd4Cre/+ : STOCK Tg(Cd4-cre)1Cwi/Bflu/J, The Jackson Laboratory JAX: 017336  
 Mouse: Ob/Ob: B6.Cg-Lepob/J, The Jackson Laboratory JAX: 000632  
 Mouse: Cd45.1, Ly5a, PtprcS<sup>JL</sup> Komuro et al., 1974 MGI:4819849  
 Mouse: Cd8<sup>-/-</sup>: B6.129S2-Cd8atm1Mak/J, The Jackson Laboratory JAX: 002665  
 Mouse: Rag2<sup>-/-</sup>: B6(Cg)-Rag2tm1.1Cgn/J, The Jackson Laboratory JAX: 008449  
 Mouse: OT-I Rag1<sup>-/-</sup> CD45.1: C57BL/6-Tg(Tcratrb)1100Mjb/J, B6.129S7-Rag1tm1Mom/J, The Jackson Laboratory JAX: 003831, 002216  
 Mouse: Prf1<sup>-/-</sup>: CD57BL/6-Prf1tm1Sdz/J, The Jackson Laboratory JAX: 002407

All animals within each experiment were age- and sex-matched. Animals were 8-12 weeks old by the start of the experiment. Between different experiments males and females were used interchangeably, as no sex-specific differences were observed in relevant parameters.

## Wild animals

The study did not involve wild animals.

## Field-collected samples

The study did not involve field-collected samples.

## Ethics oversight

Ethical approval was obtained from the Department of Biomedical Research of the Medical University of Vienna, Vienna, Austria, as well as the Central Facility for Animal Research and Scientific Animal Welfare (ZETT) in Dusseldorf, Germany, the state of Baden-Württemberg, Germany, and the Institutional Animal Care and Use Committees of the Institute of Systems Biology in Seattle.

Note that full information on the approval of the study protocol must also be provided in the manuscript.

## Plots

Confirm that:

- The axis labels state the marker and fluorochrome used (e.g. CD4-FITC).
- The axis scales are clearly visible. Include numbers along axes only for bottom left plot of group (a 'group' is an analysis of identical markers).
- All plots are contour plots with outliers or pseudocolor plots.
- A numerical value for number of cells or percentage (with statistics) is provided.

## Methodology

|                           |                                                                                                                                                                                                                                                                                                                                       |
|---------------------------|---------------------------------------------------------------------------------------------------------------------------------------------------------------------------------------------------------------------------------------------------------------------------------------------------------------------------------------|
| Sample preparation        | For flow cytometry analysis samples were obtained from either blood, spleen or inguinal lymph nodes. Blood samples were collected in MEM-1000UHeparin, then treated with RBC lysis buffer. Spleens and lymph nodes were collected in PBS-2%FCS on ice, then mechanically disrupted against 40-70µm cell trainers.                     |
| Instrument                | Flow cytometry data was collected using LSRTortessa.                                                                                                                                                                                                                                                                                  |
| Software                  | BD FACS Diva 8.0.1 was used for data collection. For data analysis we used FlowJo V10.4.2.                                                                                                                                                                                                                                            |
| Cell population abundance | No cell sorting was performed in this study.                                                                                                                                                                                                                                                                                          |
| Gating strategy           | Among live, single cells:<br>CD4 T cells were gated as: CD3+CD8+<br>CD8 T cells were gated as: CD3+CD8+ or CD44+ CD8+<br>Virus-specific CD8 T cells were gated as: CD3+ CD8+ and either GP33+ or NP396+<br>For Chimeric mice: endogenous CD8 T cells were gated as: CD45.2+CD8+ the transferred CD8 T cells were gated as CD45.1+CD8+ |

- Tick this box to confirm that a figure exemplifying the gating strategy is provided in the Supplementary Information.
