# Supplementary material
Source: PubMed Central journal article supplement (PMC6531346)
Supplement: NIHMS1526662-supplement-3.pdf [file NIHMS1526662-supplement-3.pdf]

Supplementary Table 1:

|                                | Ctrl     |         | 16h      |         | 24h      |          | 36h      |         | 48h      |         | 72h     |         | 96h     |         |
|--------------------------------|----------|---------|----------|---------|----------|----------|----------|---------|----------|---------|---------|---------|---------|---------|
|                                | Mean     | STDEV   | Mean     | STDEV   | Mean     | STDEV    | Mean     | STDEV   | Mean     | STDEV   | Mean    | STDEV   | Mean    | STDEV   |
| <b>Eotaxin</b>                 | 127,62   | 65,85   | 92,14    | 21,08   | 88,78    | 28,14    | 120,81   | 12,30   | 52,96    | 12,55   | 60,27   | 6,07    | 50,36   | 8,25    |
| <b>G-CSF</b>                   | 30,69    | 20,70   | 234,08   | 21,15   | 454,48   | 145,76   | 805,23   | 104,87  | 795,97   | 273,36  | 1142,98 | 441,38  | 518,19  | 188,38  |
| <b>GM-CSF</b>                  | <3,2     | -       | <3,2     | -       | 6,86     | 7,31     | <3,2     | -       | <3,2     | -       | <3,2    | -       | <3,2    | -       |
| <b>IFN-<math>\gamma</math></b> | <0,63    | -       | 37,80    | 7,00    | 43,16    | 6,16     | 8,51     | 4,24    | 26,17    | 11,59   | 608,70  | 184,96  | 684,16  | 173,48  |
| <b>IL-1a</b>                   | 220,43   | 154,36  | 14,36    | 12,73   | 57,25    | 79,16    | 64,04    | 15,98   | 19,50    | 16,01   | 1,64    | 0,43    | 9,60    | 16,55   |
| <b>IL-1b</b>                   | <3,2     | -       | <3,2     | -       | <3,2     | -        | <3,2     | -       | <3,2     | -       | <3,2    | -       | <3,2    | -       |
| <b>IL-2</b>                    | <2,1     | -       | <2,1     | -       | <2,1     | -        | <2,1     | -       | <2,1     | -       | <2,1    | -       | <2,1    | -       |
| <b>IL-3</b>                    | 1,31     | 0,17    | 1,52     | 0,16    | 1,44     | 0,14     | 1,55     | 0,04    | 1,45     | 0,09    | 1,45    | 0,13    | 1,41    | 0,10    |
| <b>IL-4</b>                    | <1,34    | -       | <1,34    | -       | <1,34    | -        | <1,34    | -       | <1,34    | -       | <1,34   | -       | <1,34   | -       |
| <b>IL-5</b>                    | <1,99    | -       | 5,22     | 3,81    | 3,69     | 3,40     | <1,99    | -       | <1,99    | -       | 34,67   | 26,11   | 81,84   | 20,03   |
| <b>IL-6</b>                    | <0,09    | -       | 125,68   | 32,68   | 76,53    | 49,49    | 25,30    | 15,28   | 9,19     | 10,32   | 36,41   | 14,35   | 9,04    | 3,64    |
| <b>IL-7</b>                    | <0,01    | -       | <0,01    | -       | 0,05     | 0,07     | 0,41     | 0,79    | 0,11     | 0,21    | 1,29    | 2,14    | 2,21    | 2,32    |
| <b>IL-9</b>                    | <3,2     | -       | 9,84     | 13,29   | <3,2     | -        | <3,2     | -       | <3,2     | -       | <3,2    | -       | <3,2    | -       |
| <b>IL-10</b>                   | <0,18    | -       | 9,71     | 4,92    | 10,92    | 4,45     | 14,59    | 3,81    | 6,41     | 3,81    | 1,30    | 1,46    | 0,39    | 0,42    |
| <b>IL-12(p40)</b>              | <0,27    | -       | <0,27    | -       | <0,27    | -        | <0,27    | -       | <0,27    | -       | <0,27   | -       | <0,27   | -       |
| <b>IL-12(p70)</b>              | <1,86    | -       | <1,86    | -       | <1,86    | -        | <1,86    | -       | <1,86    | -       | <1,86   | -       | <1,86   | -       |
| <b>IL-13</b>                   | <3,2     | -       | <3,2     | -       | <3,2     | -        | <3,2     | -       | <3,2     | -       | <3,2    | -       | <3,2    | -       |
| <b>IL-15</b>                   | <0,69    | -       | 3,51     | 5,64    | 1,65     | 1,93     | 5,39     | 9,39    | 3,61     | 5,84    | 10,36   | 19,34   | 8,86    | 16,35   |
| <b>IL-17</b>                   | <0,57    | -       | <0,57    | -       | <0,57    | -        | <0,57    | -       | <0,57    | -       | <0,57   | -       | <0,57   | -       |
| <b>IP-10</b>                   | 32,40    | 16,58   | 1646,91  | 262,30  | 847,57   | 301,22   | 622,68   | 63,25   | 366,53   | 37,61   | 290,25  | 27,11   | 205,53  | 26,91   |
| <b>KC</b>                      | 8,27     | 4,95    | 91,42    | 15,25   | 29,95    | 10,35    | 90,01    | 26,23   | 77,32    | 36,22   | 58,68   | 27,25   | 35,38   | 13,74   |
| <b>LIF</b>                     | <0,84    | -       | <0,84    | -       | <0,84    | -        | <0,84    | -       | <0,84    | -       | <0,84   | -       | <0,84   | -       |
| <b>LIX</b>                     | 14715,35 | 8875,36 | 11556,72 | 1589,85 | 16804,59 | 12982,59 | 21163,26 | 2643,70 | 13903,63 | 6421,48 | 6156,22 | 2932,71 | 5047,71 | 4304,10 |
| <b>MCP-1</b>                   | <2,37    | -       | 415,61   | 207,18  | 682,21   | 366,05   | 507,79   | 227,31  | 218,12   | 106,24  | 108,14  | 25,15   | 43,25   | 7,31    |
| <b>M-CSF</b>                   | 134,55   | 267,86  | 41,13    | 58,97   | 114,62   | 102,94   | 68,60    | 70,72   | 9,11     | 10,61   | <0,62   | -       | <0,62   | -       |
| <b>MIG</b>                     | 6,72     | 2,01    | 278,46   | 99,73   | 787,21   | 239,24   | 803,43   | 136,96  | 297,24   | 71,03   | 306,87  | 37,09   | 208,29  | 23,48   |
| <b>MIP-1A</b>                  | <3,2     | -       | 68,68    | 7,58    | 43,60    | 13,23    | 37,87    | 9,36    | 15,94    | 8,67    | 4,58    | 2,75    | <3,2    | -       |
| <b>MIP-1B</b>                  | <3,2     | -       | 434,73   | 97,49   | 245,80   | 71,52    | 194,26   | 23,23   | 117,56   | 20,12   | 35,69   | 12,19   | 10,62   | 14,85   |
| <b>MIP2</b>                    | 46,14    | 29,67   | 10,39    | 14,38   | 15,19    | 23,98    | 15,82    | 17,39   | 13,01    | 14,64   | <3,2    | -       | <3,2    | -       |
| <b>RANTES</b>                  | 3,82     | 0,46    | 11,60    | 4,82    | 12,28    | 6,78     | 9,69     | 2,93    | 4,84     | 0,62    | 4,62    | 0,50    | 4,53    | 1,29    |
| <b>TNF</b>                     | 2,40     | 0,24    | 5,18     | 0,76    | 5,14     | 0,57     | 5,20     | 0,50    | 3,73     | 0,49    | 3,21    | 0,21    | 2,94    | 0,33    |
| <b>VEGF</b>                    | 1,40     | 0,18    | 1,34     | 0,04    | 1,36     | 0,09     | 1,32     | 0,05    | 1,29     | 0,05    | 1,27    | 0,05    | 1,25    | 0,05    |
| <b>IFNa</b>                    | <0,000   | -       | 12483,90 | 2142,65 | 17450,51 | 4101,07  | 11505,30 | 1800,13 | 3216,97  | 1014,99 | <0,000  | -       | <0,000  | -       |
| <b>IFNb</b>                    | <0,000   | -       | 1071,96  | 214,65  | 439,38   | 78,04    | <0,000   | -       | <0,000   | -       | <0,000  | -       | <0,000  | -       |
